# Supplementary material
Source: PubMed Central journal article supplement (PMC7331794)
Supplement: NIHMS1601046-supplement-PAMI_Final__L0_JFSS_Appendix.pdf [file NIHMS1601046-supplement-PAMI_Final__L0_JFSS_Appendix.pdf]

## APPENDIX

### PD METHODS FOR SOLVING EQ. (7)

---

#### Algorithm 2 PD Algorithm for solving Eq. (7)

---

**Input:** Indicator vector  $\hat{\alpha}$ , hyperparameter  $\tau$ , precision sequence  $\{\epsilon^{(b)}\}$ , and threshold  $\epsilon_H$ .

**Initialization:** Choose any  $(\beta^{\text{feas}}, \beta_0^{\text{feas}}) \in \mathbb{S} \times \mathbb{R}$  and  $\Upsilon \geq \max\{f_H(\hat{\alpha}, \beta^{\text{feas}}, \beta_0^{\text{feas}}), \min_{\beta_0, \gamma} q(\beta^{\text{feas}}, \beta_0, \gamma)\}$  (where  $f_H$  is defined in Eq. (2) and  $q$  in Eq. (8)). Let  $\rho_0 > 0$  and  $\sigma > 1$  be arbitrarily chosen. Set  $b = 0$  and  $\tilde{\beta}^{(0)} = \beta^{\text{feas}}$ .

- 1: **repeat** ▷ Beginning of PD
  - 2: Solve Eq. (8) with  $\rho = \rho^{(b)}$  by BCD (initialize  $s = 0$ ):
  - 3: **repeat**
    - 3.1: Use IPM to solve Eq. (8) for  $\beta = \tilde{\beta}^{(s)}$ , *i.e.*,  
 $(\tilde{\beta}_0^{(s+1)}, \tilde{\gamma}^{(s+1)}) \in \text{Argmin}_{\beta_0, \gamma} q(\tilde{\beta}^{(s)}, \beta_0, \gamma)$
    - 3.2: Solve Eq. (8) with  $\beta_0 = \tilde{\beta}_0^{(s+1)}$  and  $\gamma = \tilde{\gamma}^{(s+1)}$ :  
 $\{i_1, \dots, i_p\} \leftarrow \text{Sort indices of } \tilde{\gamma}^{(s+1)} \text{ s.t.}$   
 $|\tilde{\gamma}_{i_j}^{(s+1)}| \geq |\gamma_{i_{j+1}}^{(s+1)}|$   
 $\tilde{\gamma}_i^{(s+1)} \leftarrow \begin{cases} \tilde{\gamma}_i^{(s+1)}, & \text{if } i \in \{i_1, \dots, i_\tau\} \\ 0, & \text{otherwise} \end{cases}$
    - 3.3:  $s \leftarrow s + 1$
  - 4: **until**  
 $\max\left\{\frac{\|\tilde{\beta}^{(s+1)} - \tilde{\beta}^{(s)}\|_\infty}{\max\{\|\tilde{\beta}^{(s)}\|_\infty, 1\}}, \frac{|\tilde{\beta}_0^{(s+1)} - \tilde{\beta}_0^{(s)}|}{\max\{|\tilde{\beta}_0^{(s)}|, 1\}}, \frac{\|\tilde{\gamma}^{(s+1)} - \tilde{\gamma}^{(s)}\|_\infty}{\max\{\|\tilde{\gamma}^{(s)}\|_\infty, 1\}}\right\} < \epsilon^{(b)}$
  - 5: Update  $\beta^{(b)} \leftarrow \tilde{\beta}^{(s)}$ ,  $\beta_0^{(b)} \leftarrow \tilde{\beta}_0^{(s)}$ ,  $\gamma^{(b)} \leftarrow \tilde{\gamma}^{(s)}$
  - 6: Update  $\rho^{(b+1)} \leftarrow \sigma \rho^{(b)}$
  - 7: Update  $\tilde{\beta}^{(0)} \leftarrow \begin{cases} \beta^{(b)}, & \text{if } \min_{\beta_0, \gamma} q(\beta^{(b)}, \beta_0, \gamma) \leq \Upsilon \\ \beta^{\text{feas}}, & \text{otherwise} \end{cases}$
  - 8:  $b \leftarrow b + 1$
  - 9: **until**  $\|\beta^{(b)} - \gamma^{(b)}\|_\infty \leq \epsilon_H$  ▷ Stopping Criteria
- Output:**  $(\hat{\beta}, \hat{\beta}_0) = (\beta^{(b)}, \beta_0^{(b)})$
- 

**Remarks to Algorithm 2:** Each PD iteration performs another BCD to approximate Eq. (8) until the stopping criterion (Step 4 in Algorithm 2) is reached. Specifically, by first fixing  $\beta$ , Eq. (8) simplifies to a convex optimization problem (Step 3.1 in the Algorithm), which can be solved, for example, by the Interior Point Method (IPM) [90]. Next,  $(\beta_0, \gamma)$  is fixed and then Eq. (8) becomes  $\min_{\beta} \{\|\beta - \gamma\|_2^2 : \|\beta\|_0 \leq \tau\}$ , which can be solved in closed-form (*i.e.*, Step 3.2 in Algorithm 2) according to [65, Proposition 3.1] (also quoted in Section S1 of the Supplement). The computational complexity of this problem is  $O(p \log(p))$ . Therefore, the computational cost of Algorithm 2 is

$$O(N_P N_B (C_I(n, p) + p \log(p))),$$

where  $C_I(n, p)$  is the computational complexity of IPM for  $\ell_2$ -regularized logistic regression problems and  $N_P$  (resp.,  $N_B$ ) is the maximum number of PD (resp., BCD) iterations. Note that  $C_I(n, p)$  can be different in various implementations but it is not more than polynomial.

The following proposition derives the convergence of PD to a local minimum.

**Proposition A.1.** *Suppose that  $(\hat{\beta}, \hat{\beta}_0)$  is an accumulation point of the sequence  $\{(\beta^{(b)}, \beta_0^{(b)})\}$  generated by PD. Then  $(\hat{\beta}, \hat{\beta}_0)$  is a local minimum of Eq. (7).*

*Proof.* Let  $x := (\beta, \beta_0)$ ,  $\mathcal{X} := \mathbb{R}^{p+1}$ ,  $J := \{1, \dots, p\}$  and  $f(x) := f_H(\hat{\alpha}, x) = l(\hat{\alpha}, x) + \frac{\lambda}{2} \|x_J\|_2^2$ . Then,  $\mathcal{X}$  is a closed

convex set and  $f : \mathbb{R}^{p+1} \rightarrow \mathbb{R}$  is a continuously differentiable function. Moreover,  $f$  is convex and any level set  $\mathcal{X}_\Upsilon := \{x \in \mathcal{X} : f(x) \leq \Upsilon\}$  is compact. Define  $\hat{x} := (\hat{\beta}, \hat{\beta}_0)$  and  $r := \tau$  then the Robinson condition [65, Theorem 2.1] (see also Section S1 of the Supplement) holds at  $\hat{x}$ . It then follows from Theorem 4.3 of [65] that  $\hat{x}$  is a local minimum of Eq. (7).  $\square$

### P-BCD METHODS FOR SOLVING EQ. (9)

---

#### Algorithm 3 P-BCD Algorithm for solving Eq. (9)

---

**Input:** Indicator vector  $\hat{\alpha}$ , hyperparameters  $\lambda$  and  $r$ , precision sequence  $\{\epsilon^{(b)}\}$ , and threshold  $\epsilon_P$ .

**Initialization:** Choose  $\beta^{(0)}$ ,  $0 < \mathcal{L}_{\min} < \mathcal{L}_{\max}$ ,  $\nu > 1$ ,  $c > 0$  and integer  $N \geq 0$  arbitrarily. Set  $b = 0$  and  $f^{(0)} = \infty$ .

- 1: **repeat** ▷ Beginning of BCD
  - 2: Use simplex search to solve Eq. (10) with  $\beta = \beta^{(b)}$ , *i.e.*,  
 $\beta_0^{(b+1)} \leftarrow \text{argmin}_{\beta_0} l(\hat{\alpha}, \beta^{(b)}, \beta_0)$
  - 3: Solve Eq. (11) with  $\beta_0 = \beta_0^{(b+1)}$  and  $\tilde{\beta}^{(0)} = \beta^{(b)}$  via NPG (initialize  $s = 0$ ):
  - 4: **repeat**  
Choose any  $\mathcal{L}^{(s)} \in [\mathcal{L}_{\min}, \mathcal{L}_{\max}]$
  - 5: **repeat**
    - 5.1:  $g^{(s)} = \tilde{\beta}^{(s)} - \nabla_{\beta} l(\hat{\alpha}, \tilde{\beta}^{(s)}, \beta_0^{(b+1)}) / \mathcal{L}^{(s)}$
    - 5.2:  $\{i_1, \dots, i_p\} \leftarrow \text{Sort } g^{(s)}$ , s. t.  $|g_{i_j}^{(s)}| \leq |g_{i_{j+1}}^{(s)}|$
    - 5.3:  $\tilde{\beta}_i^{(s+1)} \leftarrow \begin{cases} \text{sign}(g_{i_j}^{(s)}) \max(|g_{i_j}^{(s)}| - \lambda / \mathcal{L}^{(s)}, 0), & \text{if } i \in \{i_1, \dots, i_{p-r}\} \\ g_{i_j}^{(s)}, & \text{otherwise} \end{cases}$
    - 5.4:  $\mathcal{L}^{(s)} \leftarrow \nu \mathcal{L}^{(s)}$
    - 5.5:  $f^{(s+1)} \leftarrow f_P(\hat{\alpha}, \tilde{\beta}^{(s+1)}, \beta_0^{(b+1)})$  (as in Eq. (4))
  - 6: **until**  $f^{(s+1)} \leq \max_{\max(s-N, 0) \leq j \leq s} f^{(j)} - \frac{c}{2} \|\tilde{\beta}^{(s+1)} - \tilde{\beta}^{(s)}\|_2^2$
  - 7:  $s \leftarrow s + 1$
  - 8: **until**  $\|\nabla_{\beta} l(\hat{\alpha}, \tilde{\beta}^{(s)}, \beta_0^{(b+1)}) - \nabla_{\beta} l(\hat{\alpha}, \tilde{\beta}^{(s-1)}, \beta_0^{(b+1)}) - \mathcal{L}^{(s-1)}(\tilde{\beta}^{(s)} - \tilde{\beta}^{(s-1)})\|_\infty < \epsilon^{(b)}$
  - 9: Update  $\beta^{(b+1)} \leftarrow \tilde{\beta}^{(s)}$
  - 10: Update  $b \leftarrow b + 1$
  - 11: **until**  $\min\{|f^{(s)} - f_P(\hat{\alpha}, \beta^{(b-1)}, \beta_0^{(b-1)})|, |f^{(s)}|\} \leq \epsilon_P$
- Output:**  $(\hat{\beta}, \hat{\beta}_0) = (\beta^{(b)}, \beta_0^{(b)})$
- 

**Remarks to Algorithm 3:** P-BCD solves Eq. (9) by iterating between updating  $\beta_0$  via the simplex search approach and  $\beta$  via the Nonmonotone Proximal Gradient (NPG) method. At each iteration of P-BCD, NPG (Steps 3-8) updates  $\beta$  by iteratively determining the solution to Eq. (11) until the stopping criterion (*i.e.*, the convergence with respect to  $\beta$ , Step 8) is reached. At each iteration of NPG, the method estimates  $\tilde{\beta}^{(s+1)}$  by minimizing a proximal function  $l(\hat{\alpha}, \tilde{\beta}^{(s)}, \beta_0^{(b+1)}) + \nabla_{\beta} l(\hat{\alpha}, \tilde{\beta}^{(s)}, \beta_0^{(b+1)})^T (\beta - \tilde{\beta}^{(s)}) + \frac{\mathcal{L}^{(s)}}{2} \|\beta - \tilde{\beta}^{(s)}\|_2^2 + \lambda \|\beta\|_1^{(r)}$  with  $\nabla_{\beta} l(\cdot, \cdot, \cdot)$  denoting the partial derivative of  $l(\cdot, \cdot, \cdot)$  with respect to  $\beta$  and  $\nabla_{\beta} l(\alpha, \beta, \beta_0) = -\sum_{i=1}^n \alpha_i y_i \mathbf{x}_i (1 + \exp(y_i (\beta^\top \mathbf{x}_i + \beta_0)))^{-1}$ . According to [48, Theorem 5.5] (quoted also in Section S1 of the Supplement), this problem has a closed-form solution (*i.e.*, Step 5.3). The computational complexity of this problem is  $O(p(n + \log(p)))$ . The method updates the current estimate of  $\tilde{\beta}^{(s+1)}$  (Step 5.3) until the acceptance criterion (Step 6) is reached, that is, the current objective is slightly smaller than the largest objective from the last

$N$  iterations. Consequently, the computational cost of Algorithm 3 is

$$O(N_B p(n(N_S + n) + (n + \log(p))(\log \bar{L} - \log \mathcal{L}_{\min}) / \log \nu)),$$

where  $\bar{L} = \max\{\mathcal{L}_{\max}, \nu \underline{L}, \nu(1 + c)\}$  for some  $\underline{L} > 0$  and  $N_B$  (resp.,  $N_S$ ) is the maximum number of BCD iterations (resp., Nelder–Mead search steps).

The convergence of the P-BCD method to a local minimum of Eq. (9) is established in Theorem 2.2, which relies on the assumptions that  $\beta_0^{(b+1)}$  is an optimal solution of Eq. (10) and that  $\beta^{(b+1)}$  is a local minimum of Eq. (11). Since the simplex search method converges to the optimal solution of Eq. (10) according to [66, Theorem 4.1] (see also Section S1 of the Supplement), the former assumption is satisfied trivially. We next show that P-BCD fulfills the latter assumption, namely, NPG converges to a local minimum of Eq. (11).

**Proposition A.2.** *Suppose that  $\tilde{\beta}$  is an accumulation point of the sequence  $\{\tilde{\beta}^{(s)}\}$  generated by NPG for Eq. (11). Then  $\tilde{\beta}$  is a local minimum of Eq. (11).*

*Proof.* We first show that  $\tilde{\beta}$  is a first-order stationary point (defined as in [48, Definition 4] or Section S1 of the Supplement) of Eq. (11) and then a local minimum of Eq. (11).

To show that  $\tilde{\beta}$  is a first-order stationary point, note that  $l(\hat{\alpha}, \cdot, \beta_0^{(b+1)})$  is a continuously differentiable function on  $\mathbb{R}^p$ . Moreover,  $f_P(\hat{\alpha}, \cdot, \beta_0^{(b+1)}) = l(\hat{\alpha}, \cdot, \beta_0^{(b+1)}) + \lambda \|\cdot\|_1^{(r)}$  is bounded below and uniformly continuous on any level set  $\mathcal{S}(\tilde{\beta}) := \{\beta \in \mathbb{R}^p : f_P(\hat{\alpha}, \beta, \beta_0^{(b+1)}) \leq f_P(\hat{\alpha}, \tilde{\beta}, \beta_0^{(b+1)})\}$ . By directly applying [48, Theorem 5.2] (see also Section S1 of the Supplement) to Eq. (11) with  $f(\cdot) = l(\hat{\alpha}, \cdot, \beta_0^{(b+1)})$ ,  $F(\cdot) = f_P(\hat{\alpha}, \cdot, \beta_0^{(b+1)})$ ,  $\Phi(\cdot) = \|\cdot\|_1^{(r)}$ ,  $L_f = 1$ ,  $A = 1$  and  $B = F(\tilde{\beta})$ , then  $\tilde{\beta}$  is a first-order stationary point of Eq. (11), i.e.,

$$\mathbf{0} \in \nabla_{\beta} l(\hat{\alpha}, \tilde{\beta}, \beta_0^{(b+1)}) + \lambda \partial \Phi(\tilde{\beta}), \quad (25)$$

where  $\partial \Phi(\tilde{\beta}) = \{\gamma : \gamma^T(\beta - \tilde{\beta}) \leq \Phi(\beta) - \Phi(\tilde{\beta}), \forall \beta \in \mathbb{R}^p\}$  denotes the subdifferential of  $\Phi$  at  $\tilde{\beta}$ .

Now to show that  $\tilde{\beta}$  is a local minimum of Eq. (11), let  $\mathcal{N}(\tilde{\beta}, \epsilon) = \{\beta : \|\beta - \tilde{\beta}\|_{\infty} < \epsilon\}$  be a neighbourhood of  $\tilde{\beta}$  and  $\tilde{\beta} \in \mathcal{N}(\tilde{\beta}, \epsilon)$  be arbitrarily chosen. From Eq. (25), we know that

$$-\frac{1}{\lambda} \nabla_{\beta} l(\hat{\alpha}, \tilde{\beta}, \beta_0^{(b+1)}) \in \partial \Phi(\tilde{\beta}),$$

which along with the definition of  $\partial \Phi(\tilde{\beta})$  yields that

$$-\frac{1}{\lambda} \nabla_{\beta} l(\hat{\alpha}, \tilde{\beta}, \beta_0^{(b+1)})^T (\tilde{\beta} - \tilde{\beta}) \leq \Phi(\tilde{\beta}) - \Phi(\tilde{\beta}).$$

Using this relation,  $\lambda \geq 0$  and the convexity of  $l(\hat{\alpha}, \cdot, \beta_0^{(b+1)})$ , we further have

$$\begin{aligned} f_P(\hat{\alpha}, \tilde{\beta}, \beta_0^{(b+1)}) &= l(\hat{\alpha}, \tilde{\beta}, \beta_0^{(b+1)}) + \lambda \Phi(\tilde{\beta}) \\ &\geq l(\hat{\alpha}, \tilde{\beta}, \beta_0^{(b+1)}) - \nabla_{\beta} l(\hat{\alpha}, \tilde{\beta}, \beta_0^{(b+1)})^T (\tilde{\beta} - \tilde{\beta}) + \lambda \Phi(\tilde{\beta}) \\ &\geq l(\hat{\alpha}, \tilde{\beta}, \beta_0^{(b+1)}) + \nabla_{\beta} l(\hat{\alpha}, \tilde{\beta}, \beta_0^{(b+1)})^T (\tilde{\beta} - \tilde{\beta}) \\ &\quad - \nabla_{\beta} l(\hat{\alpha}, \tilde{\beta}, \beta_0^{(b+1)})^T (\tilde{\beta} - \tilde{\beta}) + \lambda \Phi(\tilde{\beta}) \\ &= l(\hat{\alpha}, \tilde{\beta}, \beta_0^{(b+1)}) + \lambda \Phi(\tilde{\beta}) = f_P(\hat{\alpha}, \tilde{\beta}, \beta_0^{(b+1)}), \end{aligned}$$

where the second inequality is due to the convexity of  $l(\hat{\alpha}, \cdot, \beta_0^{(b+1)})$  on  $\mathbb{R}^p$ . Given our choice of  $\tilde{\beta}$ , it thus implies that  $\tilde{\beta}$  is a local minimum of Eq. (11).  $\square$
